# Supplementary material for: A colorimetric sensing platform based on self-assembled 3D porous CeGONR nanozymes for label-free visual detection of organophosphate pesticides
Source: Royal Society of Chemistry journal article supplement (doi:10.1039/d0ma00594k), 2020-01-01
Supplement: d0ma00594k1.pdf [file d0ma00594k1.pdf]

## Supporting Information

### A Colorimetric Sensing Platform Based on Self-assembled 3D Porous CeGONRs Nanozymes for Label-Free Visual Detection of Organophosphate Pesticides

Liyun Lin, <sup>\*a</sup> Huifang Ma, <sup>a</sup> Chunliang Yang, <sup>a</sup> Wuhai Chen, <sup>a</sup> Shaodong Zeng, <sup>\*a</sup> and Yuefang Hu <sup>b</sup>

<sup>a</sup> Products Processing Research Institute, Chinese Academy of Tropical Agricultural Sciences, Zhanjiang 524001, Guangdong, China

<sup>b</sup> College of Materials and Chemical engineering, Hezhou University, Hezhou 542899, Guangxi, China

\*Corresponding author:

liyyunlin@163.com (L. Lin)

shaodongzeng@163.com (S. Zeng)

#### 1. Supporting experimental steps

##### 1.1 Preparation of GONRs

GONRs were prepared using a previously published protocol with minor modifications. Briefly, SWCNTs (20.0 mg) were dispersed in concentrated sulfuric acid (H<sub>2</sub>SO<sub>4</sub>, 80 mL, 25% by volume) and mildly sonicated for 15 min, then treated with potassium permanganate (KMnO<sub>4</sub>, 100 mg, 500 wt% by quality) and sonicated for another 15 min. The reaction mixture was stirred at room temperature for 1 h and then heated to 55-70°C for an additional 1 h. The acidic conditions are necessary for

longitudinal unzipping of SWCNTs. When the solution turned brown, heating stopped, and the solution was cooled. We examined the reaction by placing a few drops of the reaction solution into 1.0 mL of water (containing four drops of H<sub>2</sub>O<sub>2</sub>), there was no black granular residue, indicating that the reaction was complete. We then quenched the reaction mixture by pouring in 400 mL of ice water containing 2.0 mL of H<sub>2</sub>O<sub>2</sub> concentrate into the solution. The acquired solution was filtered over a polytetrafluoroethylene (PTFE) membrane and the remaining solid was washed with water several times. The sample was dialyzed for 24 h and the solid was collected for analysis.

## 1.2 Enzyme kinetics experiments

The catalytic activity of the CeGONRs was evaluated by enzyme kinetics theory and methods. Kinetic measurements were conducted in time course mode by monitoring the absorption intensity at 654 nm. Kinetic experiments were manipulated using 6.67 µg/mL CeGONRs in a reaction volume of 2.2 mL NaAc buffer (0.2 M, pH 4.0) within a range of substrate concentrations (TMB). The Michaelis–Menten constant ( $K_m$ ) was calculated using the double reciprocal of the Michaelis–Menten equation:  $1/v = (K_m/V_{max}) \cdot (C + 1/V_{max})$ , where  $v$  is the initial velocity,  $V_{max}$  is the maximal reaction velocity, and  $C$  is the substrate concentration.

## 1.3 Detection of chlorpyrifos in cabbage samples

Detection of chlorpyrifos in cabbage samples bought from the local Wal-Mart supermarket were chosen to test the feasibility of our method. First, the cabbages were cut into pieces and stirred. Next, 40.0 mL of acetonitrile was added into 20.0 g of sample and stirred for 30 min. Then the mixture was filtered, and the residue was washed again with acetonitrile. The filtrate was combined with NaCl solution, shaken for 3 min and allowed to stand for 1 h. After drying under nitrogen, the solvent was removed. Finally, the settled solids were dissolved and the prepared samples were stored at 4°C.

The residual amount of CP was determined using the accepted method of HPLC-MS to examine the accuracy of the established method. The cabbage samples were divided into four parts (A, B, C, D, respectively) of 200.0 g each, and a dose of chlorpyrifos ( $60.0 \mu\text{g kg}^{-1}$ ) was sprayed on B, C, D cabbage samples. After standing for 12 h, the samples were processed according to the above steps. Then the sample was measured by HPLC-MS. Chromatographic conditions were as follows: column, UPLC ACQUITY BEH,  $50 \times 2.1 \text{ mm}$ ,  $1.7 \mu\text{m}$ ; mobile phase acetonitrile (A)/0.1 aqueous formic acid (V: V); gradient elution, 0-1 min, 90% A; 1-2.2 min, 90% A-50% A; 2.2-3 min, 50%-90% A; 3-4 min, and 90% A for 1 min. Mass spectrometry conditions: ion source ESI, positive ion; ion source temperature  $110 \text{ }^\circ\text{C}$ ; and monitored ion pair: 349/97, 349/198.

#### **1.4 The fabricated of test strips**

The test strips were fabricated for OP detection. Briefly,  $90 \mu\text{L}$  of the supernatant from step 2.4 was dropped on the paper,  $30 \mu\text{L}$  of chlorpyrifos solutions at different concentrations (0.012, 0.10, 0.50, 1.0, 1.5, 2.0, 2.5, 3.0, 3.5) were mixed with  $30 \mu\text{L}$  of AChE solution ( $1.0 \text{ U mL}^{-1}$ ), then  $30 \mu\text{L}$  ATCh solution (10 mM) and  $150 \mu\text{L}$  PBS buffer (10 mM, pH 7.5) was added and mixed thoroughly then dropped on the paper.

## **2. Supporting Figures**

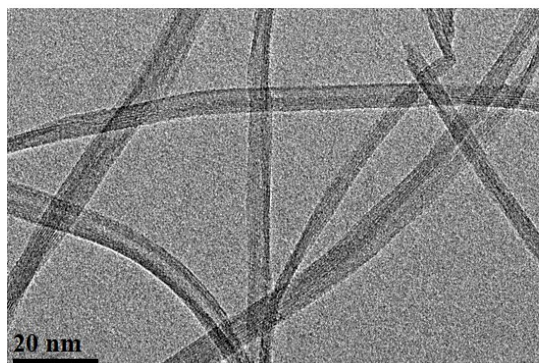

**Fig. S1** TEM images of the obtained GONRs.

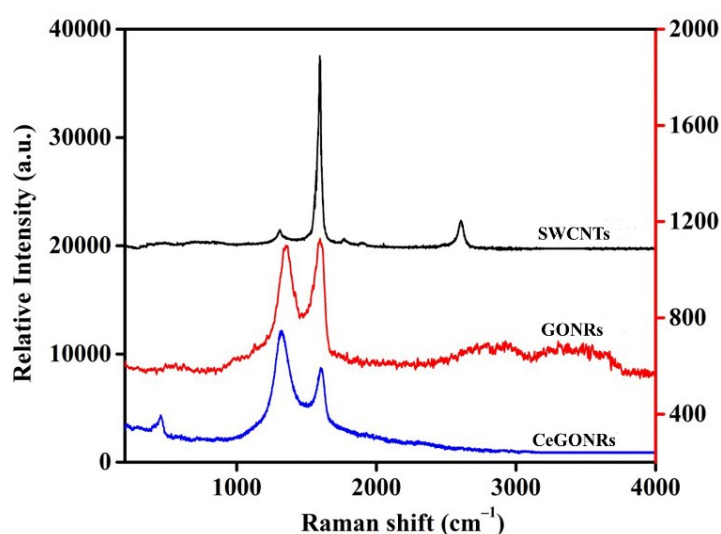

**Fig. S2** Raman spectroscopy of SWCNTs, GONRs, and CeGONRs.

Raman spectroscopy (Fig. S2) was conducted to explore SWCNTs, GONRs, and CeGONRs, which exhibited a peak at  $1305\text{ cm}^{-1}$  (called the D-band) and first-order scattering of the E<sub>2g</sub> phonons at  $1593\text{ cm}^{-1}$  (G-band)[1]. The intensity ratio (D/G) of the D- and G-band of GONRs was enhanced after oxidation [2]. This confirmed a marked increase in the degree of disorder and defective sites on the GONRs. These defective sites were beneficial for anchoring nanoceria to the support surface. The epoxy C-O oxidized the mobility of Ce(III) and the two bands shifted to  $1322$  and  $1598\text{ cm}^{-1}$ , revealing a charge transfer between the GONRs and nanoceria[3]. Another peak was observed at  $490\text{ cm}^{-1}$ , which was assigned Ce-O vibrations [4]. The appearance of the D-band at  $1358\text{ cm}^{-1}$ , attributed to GONRs, also predicted the degree of defect of

the sample (which, again, was beneficial to nanoceria precipitation). Simultaneously, the precipitated nanoceria on the GONRs further enhanced the D-band at  $1358\text{ cm}^{-1}$  and facilitated substrate adsorption on the defect surface.

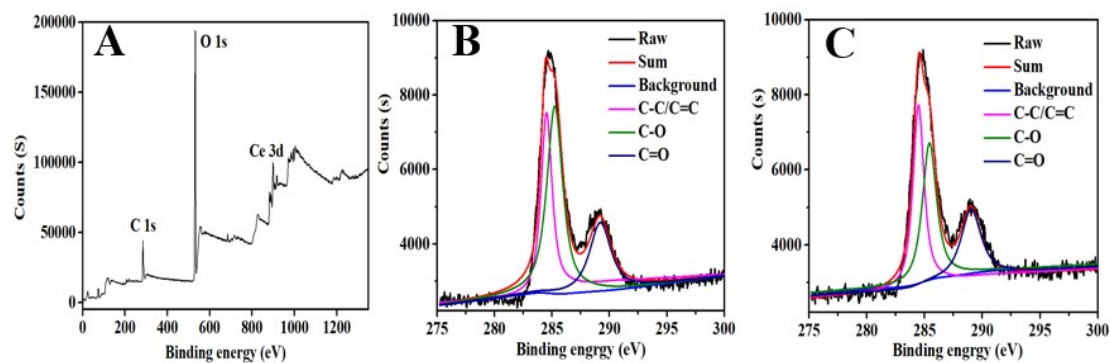

**Fig. S3** The XPS survey spectrum of CeGONRs (A), C 1s spectrum of GONRs (B), and CeGONRs (C).

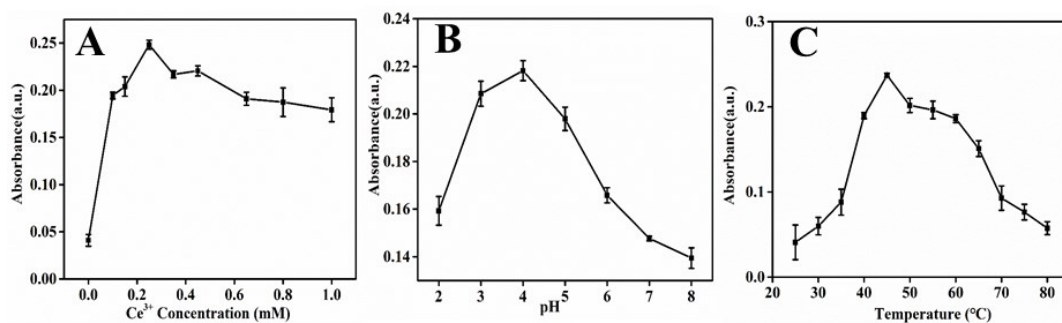

**Fig. S4** The catalytic activities of CeGONRs with different  $\text{Ce}^{3+}$  concentrations (A). The catalytic activities of CeGONRs at different pH (B), and temperature (C).

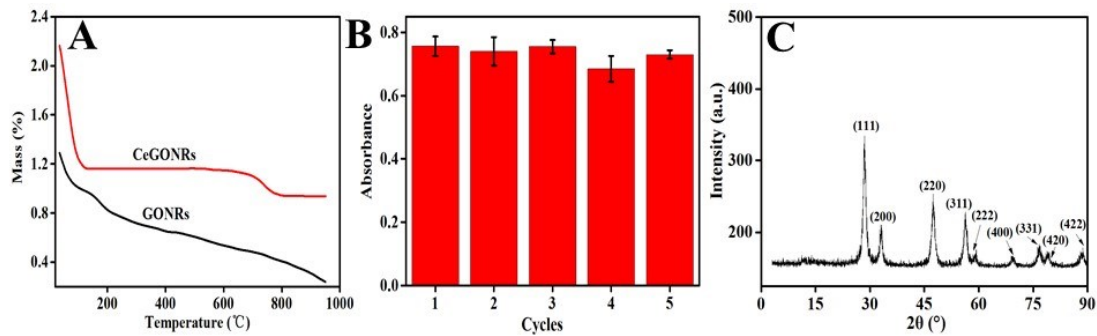

**Fig. S5** (A) The thermogravimetric analysis (TGA) results. (B) Five consecutive catalysis cycles of CeGONRs. (C) The XRD of recycling products CeGONRs for five catalytic reactions.

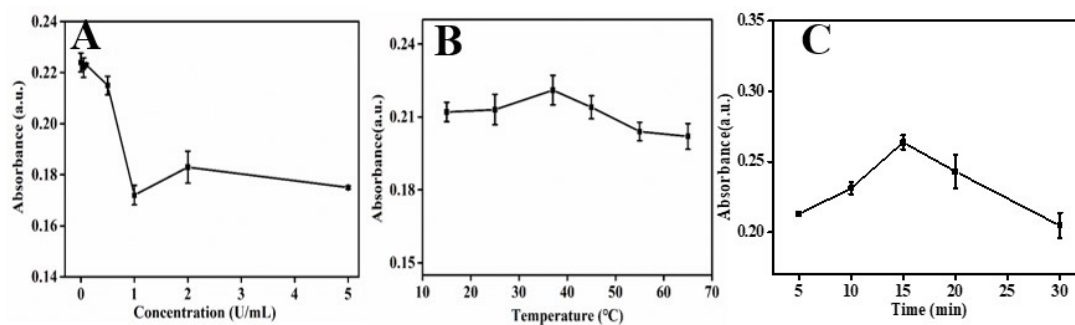

**Fig. S6** The effect of AChE concentrations (A), temperature (B), and time (C), on the catalytic activity of CeGONRs. The experiments were repeated three times.

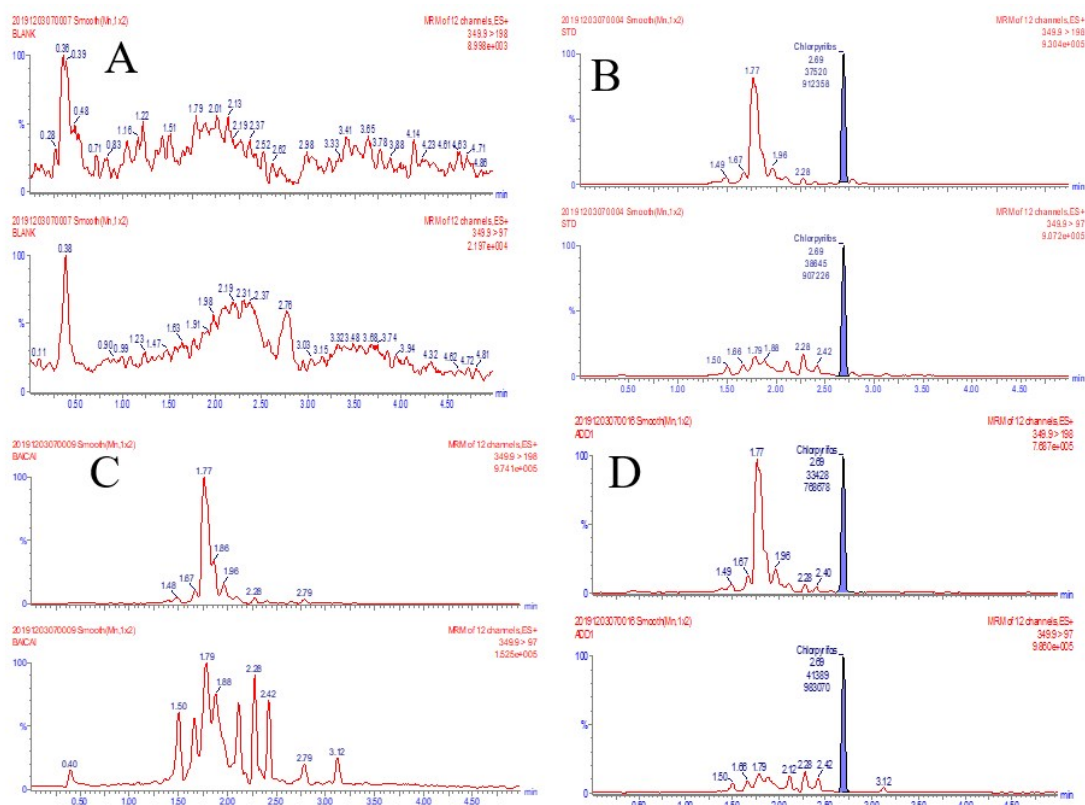

**Fig. S7** Determination of chlorpyrifos content in cabbage samples by liquid chromatography-mass spectrometry, reagent blank(A), matrix preparation standard solution (B), the cabbage sample (C) and cabbage samples sprayed with 60.0 µg/kg chlorpyrifos(D).

### 3. Supporting Table

**Table S1** Comparison of the apparent Michaelis–Menten constant ( $K_m$ ) and maximum reaction rate ( $V_{max}$ ) for CeO<sub>2</sub> NPs, CeGONRs and HRP.

| Catalyst             | Substance | $K_m$ [µM] | $V_{max}$ [ $10^{-8}$ Ms <sup>-1</sup> ] | References |
|----------------------|-----------|------------|------------------------------------------|------------|
| HRP                  | TMB       | 275        | 1.24                                     | [5]        |
| CeO <sub>2</sub> NPs | TMB       | 269        | 1.14                                     | [6]        |
| CeGONRs              | TMB       | 0.109      | 6.08                                     | This work  |

**Table S2.** The comparison of different methods for detecting organophosphorus pesticides.

| Materials                                  | OPs               | Methods         | Linear range                    | Detection Limit          | References |
|--------------------------------------------|-------------------|-----------------|---------------------------------|--------------------------|------------|
| CeGONRs                                    | Chlorpyrifos      | Colorimetric    | 0.012-3.5 $\mu\text{g mL}^{-1}$ | 3.43 $\text{ng mL}^{-1}$ | This work  |
| GO                                         | Chlorpyrifos      | Colorimetric    | 0.002-0.1 $\mu\text{g mL}^{-1}$ | 2 $\text{ng mL}^{-1}$    | [7]        |
| CS@TiO <sub>2</sub> -CS/rGO                | Dichlorvos        | Electrochemical | 0.036-22.6 $\mu\text{M}$        | 29 nM                    | [8]        |
| Au NCs                                     | Chlorpyrifos      | Luminescent     | 0-5.0 $\mu\text{M}$             | 0.5 $\mu\text{M}$        | [9]        |
| EuMOFs/CDs@CMC                             | Chlorpyrifos      | Fluorescent     | 5-40 $\mu\text{M}$              | 89 nM                    | [10]       |
| SPE/PHA/ mPEG                              | Chlorpyrifos      | Electrochemical | 1.0-10.0 $\mu\text{M}$          | 0.83 $\mu\text{M}$       | [11]       |
| AuNRs@MS                                   | Dichlorvos        | Electrochemical | 0.18-13.6 $\mu\text{M}$         | 5.3 nM                   | [12]       |
|                                            | Fenthion          |                 |                                 | 1.3 nM                   |            |
| MnOOH NWs                                  | Omethoate         | Electrochemical | 5-50 $\text{ng mL}^{-1}$        | 0.35 $\text{ng mL}^{-1}$ | [13]       |
|                                            | Dichlorvos        |                 | 1-10 $\text{ng mL}^{-1}$        | 0.14 $\text{ng mL}^{-1}$ |            |
| TiO <sub>2</sub> NPs                       | Methyl paraoxon   | Electrochemical | 0.5–100 $\mu\text{M}$           | 0.24 $\mu\text{M}$       | [14]       |
|                                            | Methyl parathion  |                 |                                 | 0.22 $\mu\text{M}$       |            |
| AlEgens-SiO <sub>2</sub> -MnO <sub>2</sub> | Paraoxon          | Fluorescent     | 1–100 $\mu\text{g L}^{-1}$      | 1 $\mu\text{g L}^{-1}$   | [15]       |
| QDs                                        | Parathionparaoxon | Fluorescent     | 5-100 $\text{mg L}^{-1}$        | 10 $\mu\text{g mL}^{-1}$ | [16]       |
| AuPt Hydrogels                             | paraoxon-ethyl    | Electrochemical | 0.5-1000 $\text{ng L}^{-1}$     | 0.185 $\text{ng L}^{-1}$ | [17]       |

**Table S3** Standard addition method utilized for quantitative analyses of chlorpyrifos in cabbage samples, and results of the recovery experiment

| Sample | Added ( $\mu\text{g kg}^{-1}$ ) | Found ( $\mu\text{g kg}^{-1}$ ) | Recovery (%) | RSD (%) |
|--------|---------------------------------|---------------------------------|--------------|---------|
| 1      | 0                               | 0                               | —            | —       |
| 2      | 60.0                            | 62.7                            | 104.5        | 3.1     |
| 3      | 100.0                           | 103.0                           | 103.0        | 2.9     |
| 4      | 200.0                           | 191.4                           | 95.7         | 2.3     |



## References

- [1] Song Y, Qu K, Zhao C, et al. *Advanced Materials*, 2010, 22(19): 2206-2210.
- [2] Sun L, Ding Y, Jiang Y, et al. *Sensors and Actuators B: Chemical*, 2017, 239: 848-856.
- [3] Fu L, Wang Y, Zhang K, et al. *ACS nano*, 2019, 13(6): 6341-6347.
- [4] Jiao L, Zhang L, Wang X, et al. *Nature*, 2009, 458(7240): 877.
- [5] Kosynkin D V, Higginbotham A L, Sinitskii A, et al. *Nature*, 2009, 458(7240): 872.
- [6] Jiang S, Hou P X, Chen M L, et al.. *Science advances*, 2018, 4(5): eaap9264.
- [7] Chu S, Huang W, Shen F, et al. *Nanoscale*, 2020.( DOI: 10.1039/C9NR10862A)
- [8] Cui H F, Wu W W, Li M M, et al. *Biosensors and Bioelectronics*, 2018, 99: 223-229.
- [9] Lu Q, Zhou T, Wang Y, et al. *Biosensors and Bioelectronics*, 2018, 99: 274-280.
- [10] Xu X Y, Yan B, Lian X. *Nanoscale*, 2018, 10(28): 13722-13729.
- [11] Sgobbi L F, Machado S A S. *Biosensors and Bioelectronics*, 2018, 100: 290-297.
- [12] Cui H F, Zhang T T, Lv Q Y, et al. *Biosensors and Bioelectronics*, 2019, 141: 111452.
- [13] Huang L, Sun D W, Pu H, et al. *Sensors and Actuators B: Chemical*, 2019, 290: 573-580.
- [14] Qiu L, Lv P, Zhao C, et al. *Sensors and Actuators B: Chemical*, 2019, 286: 386-393.
- [15] Wu X, Wang P, Hou S, et al. *Talanta*, 2019, 198: 8-14.
- [16] Luan E, Zheng Z, Li X, et al. *Analytica Chimica Acta*, 2016, 916: 77-83.
- [17] Wu Y, Jiao L, Xu W, et al. *Small*, 2019, 15(17): 1900632.
